# Supplementary material for: Ether-Oxygen Containing Electrospun Microfibrous and Sub-Microfibrous Scaffolds Based on Poly(butylene 1,4-cyclohexanedicarboxylate) for Skeletal Muscle Tissue Engineering
Source: Int J Mol Sci. 2018 Oct 17;19(10):3212. doi: 10.3390/ijms19103212 (PMC6214009; doi:10.3390/ijms19103212)
Supplement: Supplementary file 1 [file ijms-19-03212-s001.pdf]

**Table S1.** Electrospinning solutions and process parameters

| <b>sample</b>  | <b>solution for electrospinning</b>           | <b>process parameters<sup>a</sup></b>  |
|----------------|-----------------------------------------------|----------------------------------------|
| micro-PBCE     | 30 w/v% in TFE <sup>b</sup>                   | d=20 cm, r=1.2 ml/h, $\Delta V$ =15 kV |
| sub-micro-PBCE | 20 w/v% in TFE                                | d=20 cm, r=1.2 ml/h, $\Delta V$ =14 kV |
| micro-P82      | 22 w/v% in TFE                                | d=20 cm, r=1.2 ml/h, $\Delta V$ =13 kV |
| sub-micro-P82  | 20 w/v% in TFE/DMAC <sup>c</sup> =90/10 (v/v) | d=20 cm, r=0.6 ml/h, $\Delta V$ =13 kV |
| micro-P73      | 30 w/v% in TFE                                | d=15 cm, r=2.4 ml/h, $\Delta V$ =14 kV |
| sub-micro-P73  | 22 w/v% in TFE                                | d=20 cm, r=0.6 ml/h, $\Delta V$ =18 kV |

a) d= needle-to-collector distance; r= solution flow rate;  $\Delta V$ = applied voltage.

b) TFE= 2,2,2-Trifluoroethanol, purchased from Sigma-Aldrich.

c) DMAC= N,N-Dimethylacetamide, purchased from Sigma-Aldrich.

**Table S2.** Primers used for qRT-PCR.

| Genes                | Accession number | Annealing T° | Forward 5'-3'          | Reverse 3'-5'         | Amplicon size (bp) |
|----------------------|------------------|--------------|------------------------|-----------------------|--------------------|
| PGK <sup>a)</sup>    | NM_008828.3      | 60°C         | CAAAATGTCGTCTTCCAACAAG | AACGTTGAAGTCCACCCTCAT | 115                |
| MyoD                 | NM_010866.2      | 60°C         | TACAGTGGCGACTCAGATGC   | TAGTAGGCGGTGTCGTAGCC  | 116                |
| Myog <sup>b)</sup>   | NM_031189.2      | 58°C         | GGGCCCCTGGAAGAAAAG     | AGGAGGCGCTGTGGGAGTT   | 363                |
| MyHC                 | NM_007710.2      | 60°C         | CCTGTTTGATCCCATCATCC   | AGCACATAGTTGGGGTCCAG  | 119                |
| M-cadh <sup>c)</sup> | NM_007662.2      | 60°C         | CTTGGGTGCCACGGATGA     | ATGCAGGCCCTCGGAGAC    | 160                |

<sup>a)</sup> PGK, phosphoglycerate kinase; <sup>b)</sup> Myog, myogenin; <sup>c)</sup> M-cadherin.

**Table S3.** Calorimetric data of PBCE and P(BCE-*co*-TECE) copolymers in form of films and electrospun scaffolds from first heating scan (heating rate 20°C/min).

| Polymer        | T <sub>m</sub> (°C)     | ΔH <sub>m</sub> <sup>a</sup> (J/g) | χ <sub>c</sub> (%) <sup>b</sup> |
|----------------|-------------------------|------------------------------------|---------------------------------|
| film-PBCE      | 47-155-165 <sup>c</sup> | 67                                 | 86                              |
| micro-PBCE     | 58-170 <sup>c</sup>     | 48                                 | 62                              |
| sub-micro-PBCE | 58-166 <sup>c</sup>     | 42                                 | 54                              |
| film-P82       | 43-130-135 <sup>c</sup> | 58                                 | 74                              |
| micro-P82      | 55-133 <sup>c</sup>     | 40                                 | 51                              |
| nano-P82       | 50-133 <sup>c</sup>     | 36                                 | 46                              |
| film-P73       | 43-110 <sup>c</sup>     | 43                                 | 55                              |
| micro-P73      | 51-113 <sup>c</sup>     | 32                                 | 41                              |
| nano-P73       | 54-111 <sup>c</sup>     | 29                                 | 37                              |

a) neat ΔH<sub>m</sub>

b) crystallinity degree from Equation 1

c) multiple melting peaks

### Differential Scanning Calorimetry (DSC)

Differential Scanning Calorimetry (DSC) measurements were carried out using a TA Instruments Q100 DSC equipped with the Liquid Nitrogen Cooling System (LNCS) accessory. DSC scans were performed from –50°C to 200°C in helium atmosphere. A rate of 20°C/min was used during heating scans whereas the cooling scans were performed at a rate of 10°C/min. The degree of crystallinity (χ<sub>c</sub>) was calculated by using equation 1:

$$\chi_c = \frac{\Delta H_m}{\Delta H_m^0} \cdot 100 \quad [1]$$

Where ΔH<sub>m</sub> is the melting enthalpy associated to the first heating scan and ΔH<sub>m</sub><sup>0</sup> is the theoretical melting enthalpy of the 100% crystalline PBCE homopolymer, equal to 78 J/g.<sup>1</sup>

**Table S4.** Mechanical data of PBCE and P(BCE-*co*-TECE) copolymers in form of films and electrospun scaffolds

| <b>Sample</b>  | <b>E (MPa)<sup>a</sup></b> | <b><math>\sigma_b</math> (MPa)<sup>b</sup></b> | <b><math>\epsilon_b</math> (%)<sup>c</sup></b> |
|----------------|----------------------------|------------------------------------------------|------------------------------------------------|
| film-PBCE      | 466 ± 8                    | 35 ± 2                                         | 25 ± 7                                         |
| micro-PBCE     | 54 ± 5                     | 20 ± 3                                         | 54 ± 5                                         |
| sub-micro-PBCE | 58 ± 7                     | 16 ± 2                                         | 74 ± 9                                         |
| film-P82       | 270 ± 9                    | 18 ± 2                                         | 221 ± 8                                        |
| micro-P82      | 34 ± 2                     | 14 ± 1                                         | 64 ± 8                                         |
| sub-micro-P82  | 37 ± 4                     | 11 ± 1                                         | 43 ± 2                                         |
| film-P73       | 159 ± 3                    | 15 ± 1                                         | 440 ± 40                                       |
| micro-P73      | 14 ± 2                     | 8.3 ± 0.8                                      | 51 ± 4                                         |
| sub-micro-P73  | 16 ± 2                     | 8 ± 1                                          | 44 ± 2                                         |

E = tensile elastic modulus    b)  $\sigma_b$  = stress at break    c)  $\epsilon_b$  = elongation at break

**Figure S1**

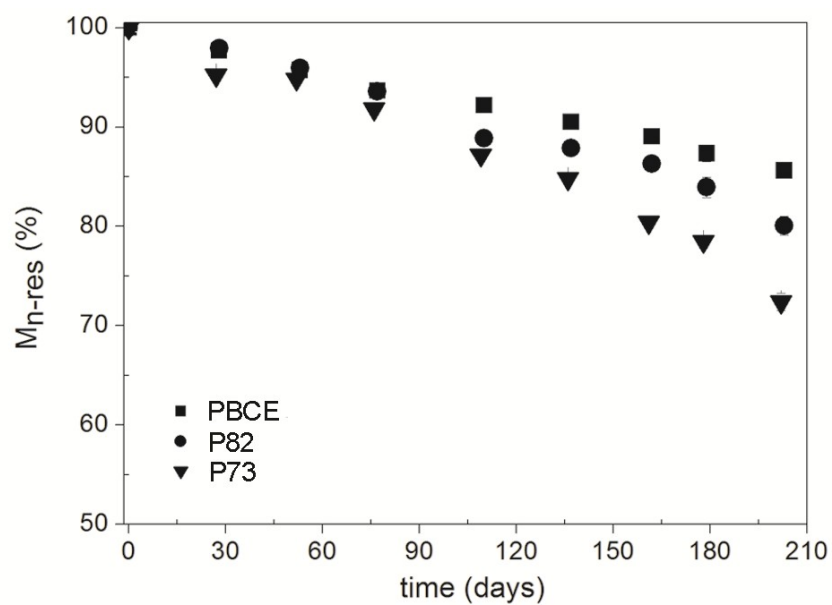

**S1. Polymer hydrolytic degradation.** Percentage of residual number average molecular weight ( $M_{n-res}$  %) as a function of degradation time for PBCE and P(BCE-*co*-TECE) copolymers in form of films.

**Figure S2.**

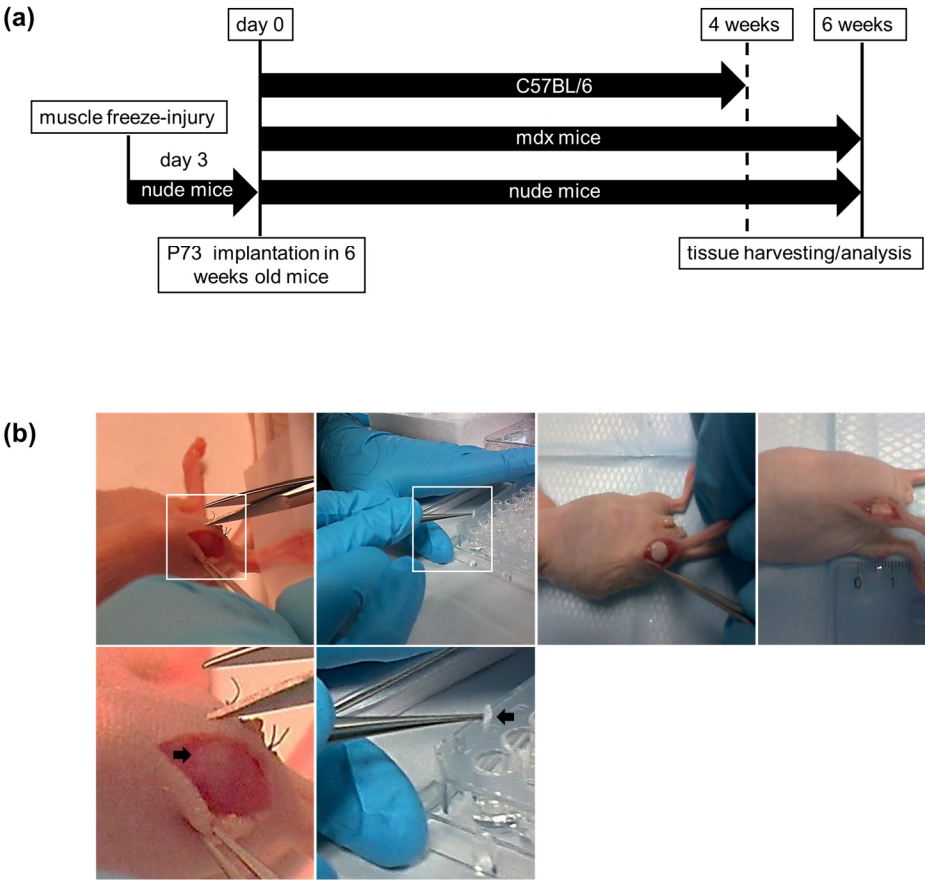

**S2.** (a) *In vivo* experimental design. (b) Details of scaffold implantation in injured *tibialis anterior* (TA) muscle of athymic nude mouse. Lower panels show magnification areas of freeze-injured TA (left panel) and P73 scaffold (right panel).

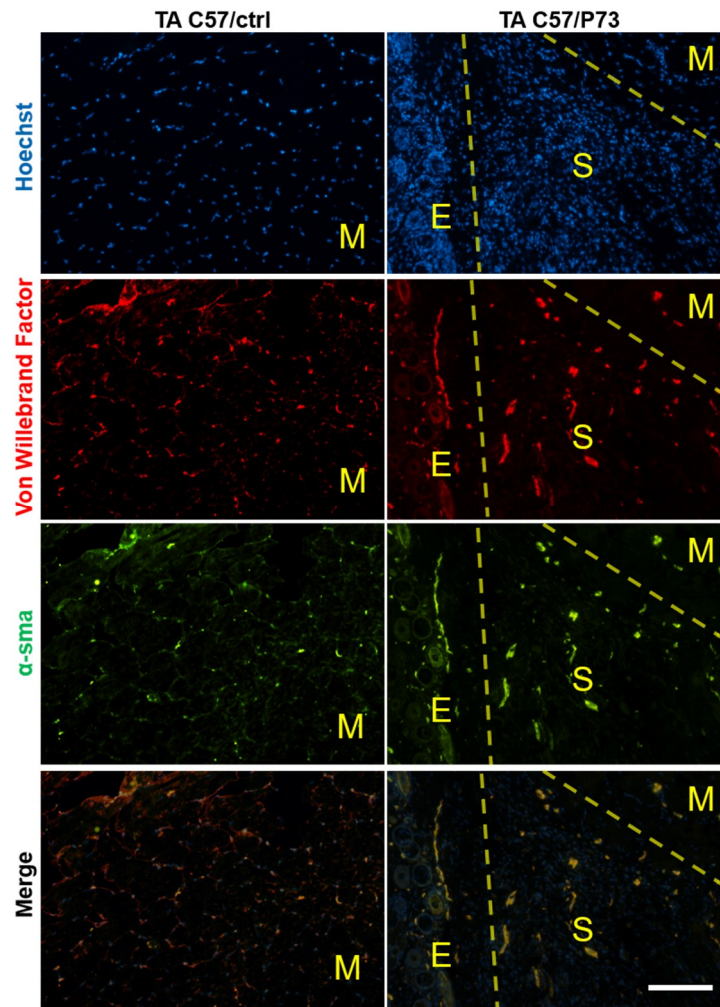

**Figure S3**

**S3.** Immunofluorescence analysis of Von Willebrand factor (red) and  $\alpha$ -sma ( $\alpha$ -smooth muscle actin in green) in *tibialis anterior* (TA) muscles from C57BL/6 healthy and not injured P73-implanted mice. Nuclei are stained in blue with Hoechst. S = scaffold; M = muscle; E = epidermis. Scale bar = 100  $\mu$ m.

**Figure S4**

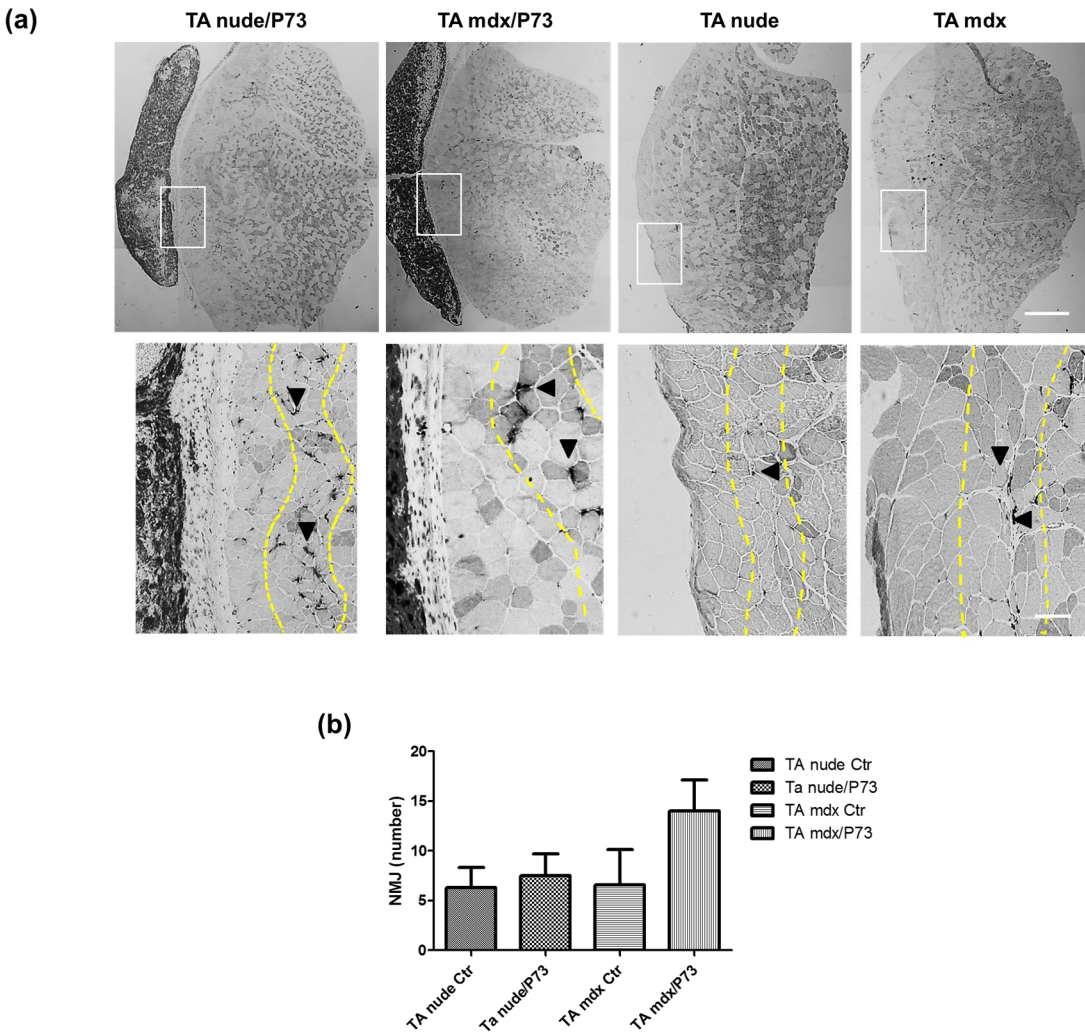

**S4.** Histological analysis of neuromuscular junction content in P73-implanted muscles. (a) P73-implanted and control muscles sections of athymic and mdx mice stained with esterase showing neuromuscular junctions (black arrowheads) near to the transplanted area (dashed yellow lines). Bottom panels show magnification areas from rectangles. (b) Quantification of neuromuscular junctions (NMJ) from (a) ( $n = 3$  each experimental condition). Scale bars: upper panel = 0.5 mm; lower panel = 200  $\mu$ m.

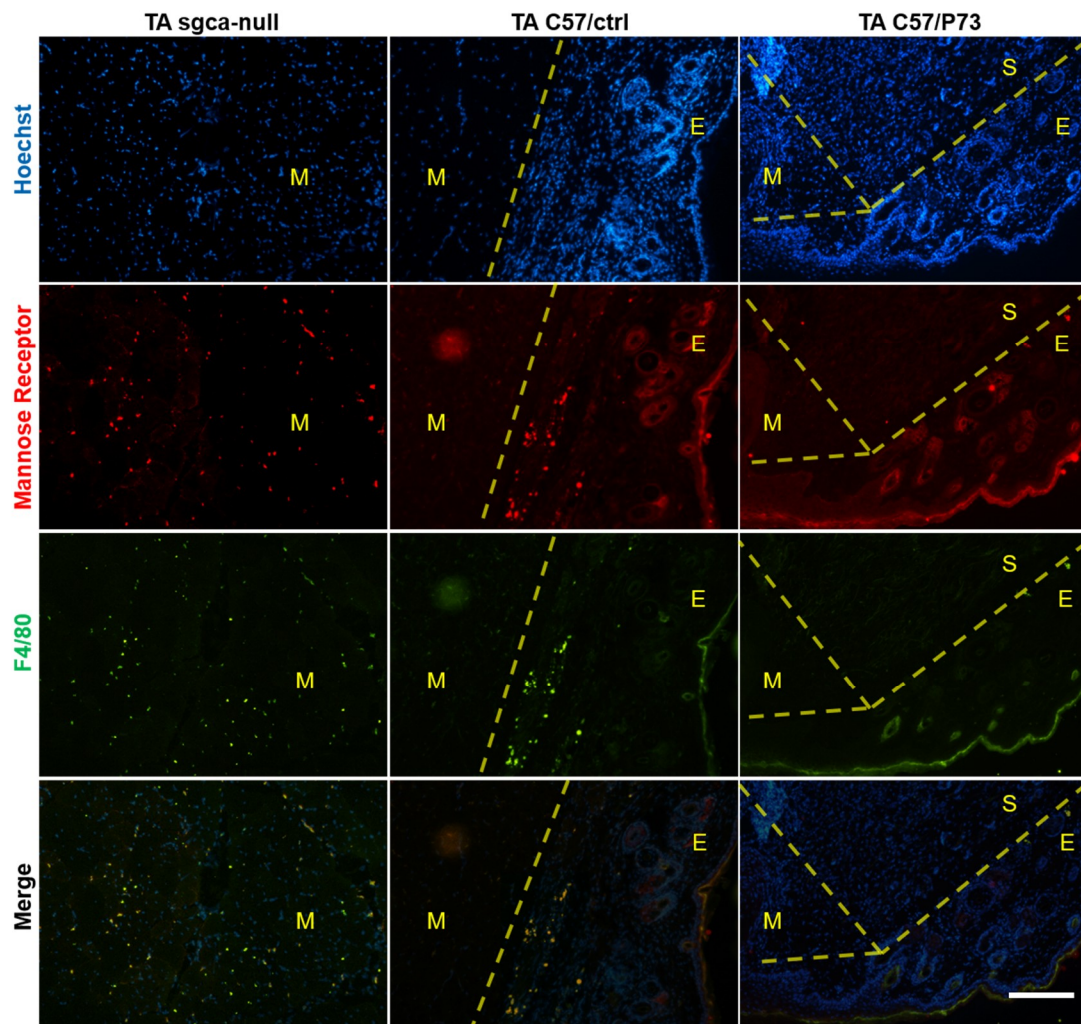

**Figure S5**

**S5.** Immunofluorescence analysis of mannose receptor (red) and F4/80 expression (green) in *tibialis anterior* (TA) muscles from *Sgca*-null, C57 not-implanted (ctr) and not injured C57/P73-implanted mice. Nuclei are stained in blue with Hoechst. S = scaffold; M = muscle; E = epidermis. Scale bar = 100  $\mu$ m.

## Reference

- (1) Celli, A.; Marchese, P.; Sullalti, S.; Berti, C.; Barbiroli, G. Eco-Friendly Poly(butylene 1,4-Cyclohexanedicarboxylate): Relationships Between Stereochemistry and Crystallization Behavior. *Macromol. Chem. Phys.* **2011**, *212* (14), 1524–1534.
